# Supplementary material for: Associations of metal exposure with hyperuricemia and gout in general adults
Source: PubMed Central journal article supplement (PMC9755211; doi:10.3389/fendo.2022.1052784), 2022-12-02
Supplement: DataSheet_1.pdf [file DataSheet_1.pdf]

## Online Supplementary Material

### Associations of Metal Exposure with Hyperuricemia and Gout in General Adults

Jing Xu; Xu Zhu; Rutai Hui; Yujie Xing; Junkui Wang; Shuang Shi; Yong Zhang; Ling Zhu

**Figure S1.** Eligible participants in the evaluation of the influence between blood metals and serum uric acid (SUA), hyperuricemia or gout in the general adult population.

**Table S1.** Concentrations and detection rate of the blood heavy metals.

**Figure S2.** Pairwise spearman correlation coefficients among blood heavy metals in the general population.

**Figure S3.** Histogram of distribution of residuals of linear regression investigating the associations of blood metal levels with serum uric acid.

**Table S2.** Subgroup analysis based on different age ( $\leq 50$  years;  $n=7534$ , and  $>50$  years;  $n=7337$ ) and gender (male;  $n=7328$ , and female;  $n=7543$ ) for the associations of the quartiles of blood metal levels with hyperuricemia by logistic regression.

**Table S3.** Subgroup analysis based on different age ( $\leq 50$  years;  $n=7534$ , and  $>50$  years;  $n=7337$ ) and sex (male;  $n=7328$ , and female;  $n=7543$ ) for the associations of the quartiles of blood metal levels with gout by logistic regression.

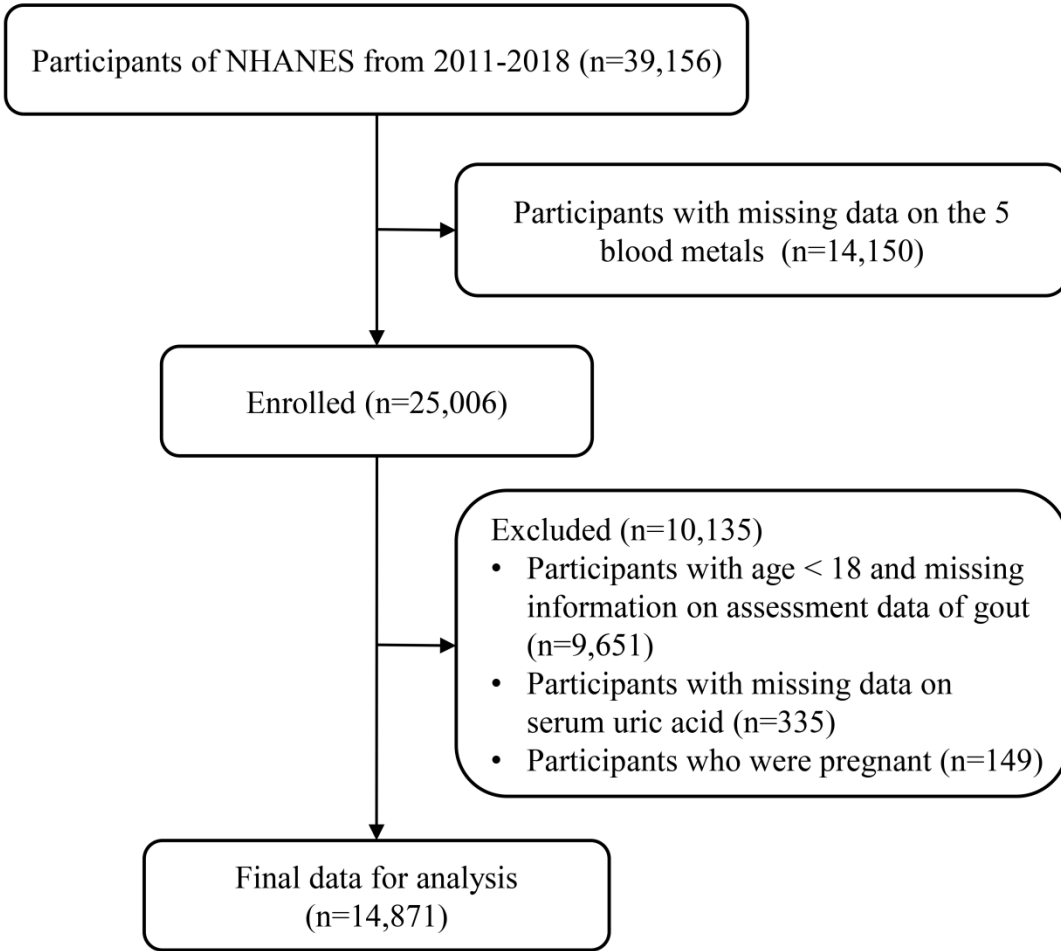

**Figure S1.** Eligible participants in the evaluation of the influence between blood metals and serum uric acid (SUA), hyperuricemia or gout in the general adult population.

**Table S1.** Concentrations and detection rate of the blood heavy metals.

| Metals          | N     | LODmax | ≥LODmax(%) <sup>a</sup> | 5 <sup>th</sup> | 25 <sup>th</sup> | 50 <sup>th</sup> | 75 <sup>th</sup> | 95 <sup>th</sup> |
|-----------------|-------|--------|-------------------------|-----------------|------------------|------------------|------------------|------------------|
| Mercury, ug/L   | 14871 | 0.28   | 100.0                   | 0.20            | 0.40             | 0.78             | 1.66             | 5.63             |
| Manganese, ug/L | 14871 | 0.99   | 100.0                   | 5.34            | 7.41             | 9.26             | 11.66            | 16.69            |
| Lead, ug/dL     | 14871 | 0.07   | 99.0                    | 0.35            | 0.64             | 1.02             | 1.63             | 3.32             |
| Cadmium, ug/L   | 14871 | 0.10   | 100.0                   | 0.11            | 0.19             | 0.32             | 0.58             | 1.53             |
| Selenium, ug/L  | 14871 | 24.48  | 100.0                   | 156.10          | 176.86           | 191.51           | 207.20           | 236.15           |

N, number of urinary samples; LOD, limit of detection; 5<sup>th</sup>, 5th percentile; 25<sup>th</sup>, 25th percentile; 50<sup>th</sup>, 50th percentile; 75<sup>th</sup>, 75th percentile; 95<sup>th</sup>, 95th percentile;

<sup>a</sup> Percentage of metabolite concentrations at or above the maximum limit of detection

(< LODmax). All concentrations below the LODmax (< LODmax) were substituted with a value of LODmax divided by square root of two ( $\sqrt{2}$ ).

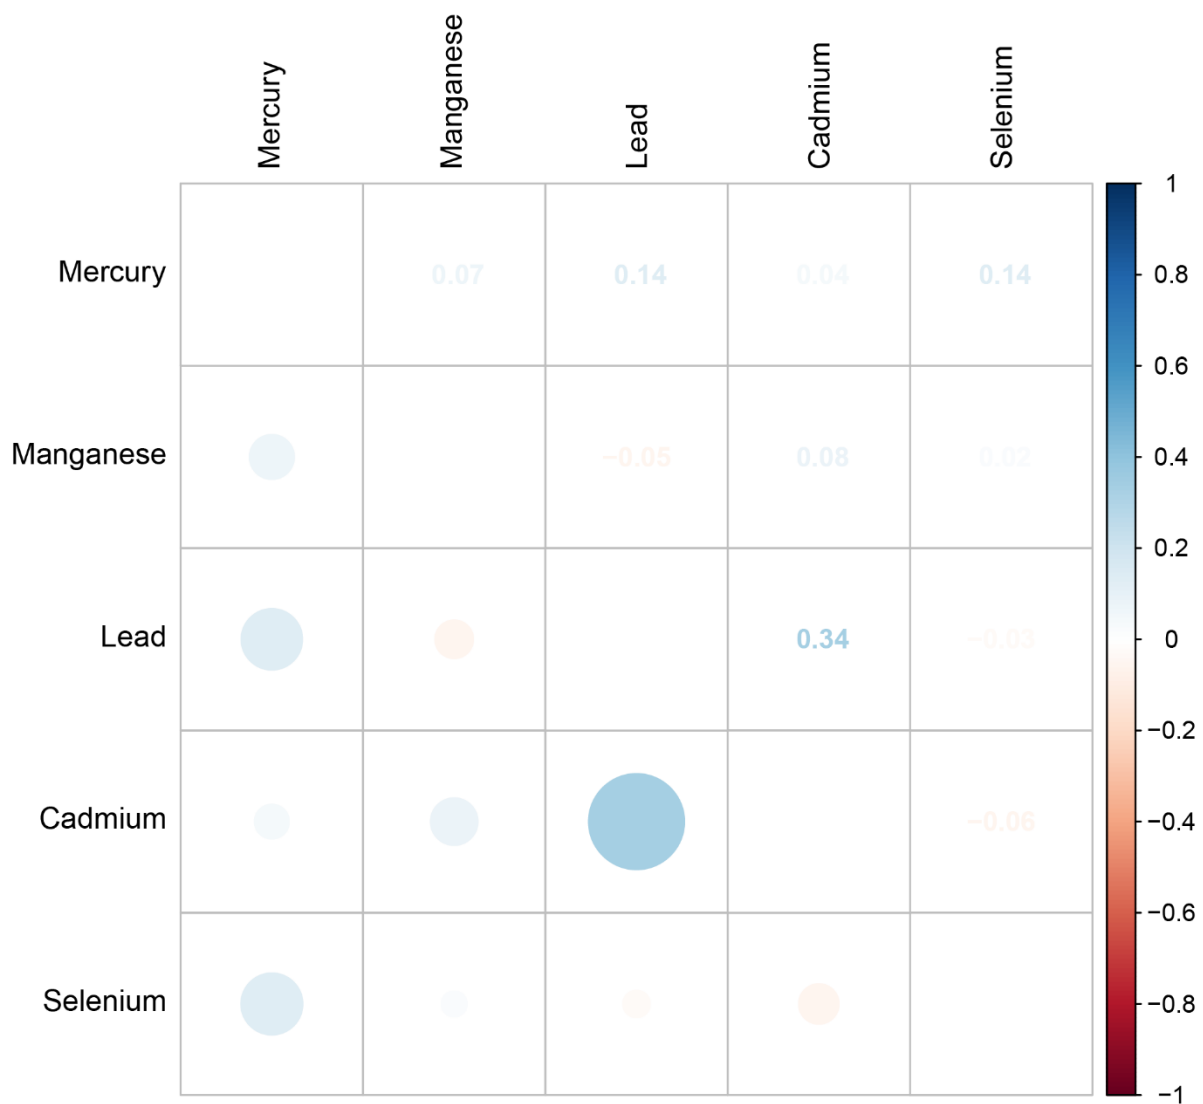

**Figure S2.** Pairwise spearman correlation coefficients among blood metals in the general population.

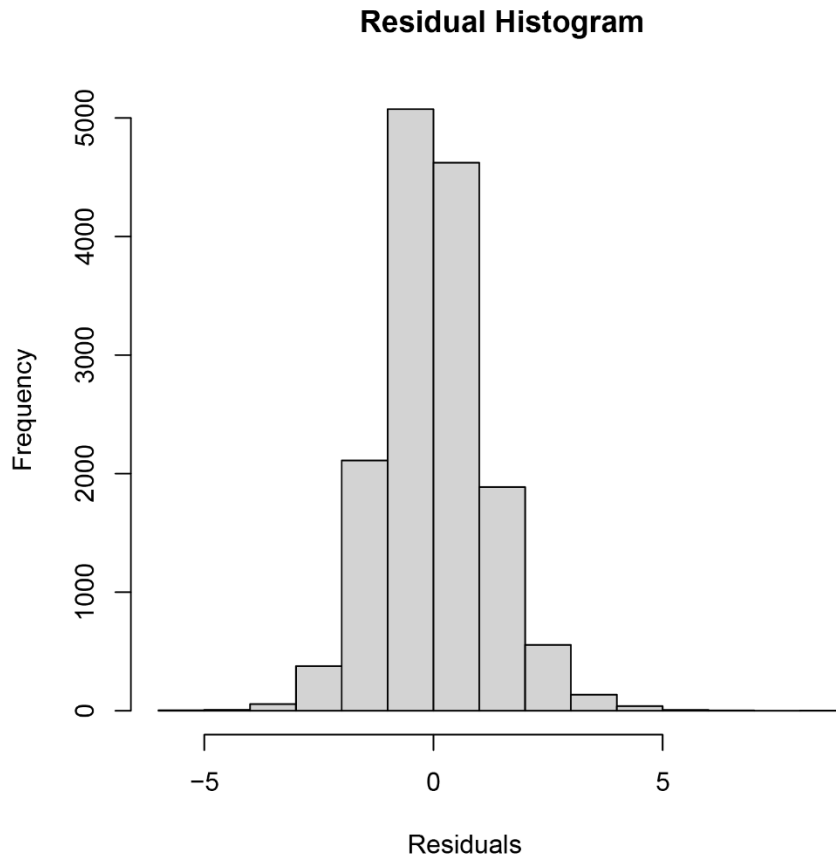

**Figure S3.** Histogram of distribution of residuals of linear regression investigating the associations of blood metal levels with serum uric acid. The model included age, sex, education level, race, poverty, smoker, alcohol user, energy intake levels, sedentary time, BMI, total cholesterol, high-density lipoprotein cholesterol, eGFR, urinary creatinine, urinary albumin, diuretics, anti-gout medications, beta-blockers, diabetes, and hypertension.

**Table S2.** Subgroup analysis based on different age ( $\leq 50$  years;  $n=7534$ , and  $>50$  years;  $n=7337$ ) and sex (male;  $n=7328$ , and female;  $n=7543$ ) for the associations of the quartiles of blood metal levels with hyperuricemia by logistic regression.

|                                              | Quartile 1       | Quartile 2          | Quartile 3          | Quartile 4          | <i>p-t</i> | <i>p-int</i> |
|----------------------------------------------|------------------|---------------------|---------------------|---------------------|------------|--------------|
|                                              | $\beta$          | $\beta$ (95%CI)     | $\beta$ (95%CI)     | $\beta$ (95%CI)     |            |              |
| <b>Mercury, <math>\mu\text{g/L}</math></b>   |                  |                     |                     |                     |            |              |
| $\leq 50$ years                              | 1.00 [Reference] | 1.213 (1.008-1.461) | 0.941 (0.769-1.152) | 1.136 (0.921-1.401) | 0.045      | 0.258        |
| $>50$ years                                  | 1.00 [Reference] | 1.201 (1.002-1.439) | 1.141 (0.949-1.371) | 1.399 (1.161-1.684) | 0.004      |              |
| Male                                         | 1.00 [Reference] | 1.133 (0.955-1.345) | .888 (0.741-1.064)  | 1.108 (0.925-1.327) | 0.028      | 0.001        |
| Female                                       | 1.00 [Reference] | 1.315 (1.077-1.606) | 1.293 (1.053-1.586) | 1.606 (1.297-1.989) | $<0.001$   |              |
| <b>Manganese, <math>\mu\text{g/L}</math></b> |                  |                     |                     |                     |            |              |
| $\leq 50$ years                              | 1.00 [Reference] | 1.006 (0.821-1.233) | 1.013 (0.824-1.244) | 1.208 (0.978-1.491) | 0.188      | 0.868        |
| $>50$ years                                  | 1.00 [Reference] | 0.909 (0.770-1.073) | 0.919 (0.775-1.090) | 0.899 (0.747-1.082) | 0.605      |              |
| Male                                         | 1.00 [Reference] | 0.893 (0.757-1.052) | 0.958 (0.808-1.136) | 1.100 (0.913-1.324) | 0.164      | 0.072        |
| Female                                       | 1.00 [Reference] | 0.964 (0.785-1.184) | 0.898 (0.731-1.102) | 0.951 (0.771-1.173) | 0.771      |              |
| <b>Lead, <math>\mu\text{g/dL}</math></b>     |                  |                     |                     |                     |            |              |
| $\leq 50$ years                              | 1.00 [Reference] | 1.053 (0.879-1.263) | 1.087 (0.884-1.337) | 1.413 (1.130-1.768) | 0.019      | 0.503        |
| $>50$ years                                  | 1.00 [Reference] | 1.168 (0.914-1.492) | 1.210 (0.954-1.536) | 1.408 (1.104-1.797) | 0.023      |              |
| Male                                         | 1.00 [Reference] | 1.029 (0.842-1.258) | 1.205 (0.982-1.479) | 1.489 (1.205-1.841) | $<0.001$   | $<0.001$     |
| Female                                       | 1.00 [Reference] | 1.168 (0.953-1.431) | 1.148 (0.925-1.425) | 1.520 (1.204-1.918) | 0.004      |              |
| <b>Cadmium, <math>\mu\text{g/L}</math></b>   |                  |                     |                     |                     |            |              |
| $\leq 50$ years                              | 1.00 [Reference] | 1.067 (0.892-1.276) | 0.855 (0.682-1.073) | 0.821 (0.633-1.064) | 0.145      | $<0.001$     |
| $>50$ years                                  | 1.00 [Reference] | 1.180 (0.969-1.435) | 1.134 (0.932-1.380) | 1.395 (1.115-1.745) | 0.026      |              |
| Male                                         | 1.00 [Reference] | 1.146 (0.972-1.350) | 1.088 (0.899-1.318) | 1.166 (0.934-1.455) | 0.357      | 0.155        |
| Female                                       | 1.00 [Reference] | 1.048 (0.842-1.306) | 0.962 (0.770-1.202) | 1.182 (0.912-1.530) | 0.267      |              |
| <b>Selenium, <math>\mu\text{g/L}</math></b>  |                  |                     |                     |                     |            |              |
| $\leq 50$ years                              | 1.00 [Reference] | 1.171 (0.951-1.443) | 1.065 (0.864-1.311) | 1.292 (1.052-1.586) | 0.064      | 0.369        |
| $>50$ years                                  | 1.00 [Reference] | 1.172 (0.986-1.394) | 1.112 (0.931-1.328) | 1.292 (1.083-1.541) | 0.037      |              |
| Male                                         | 1.00 [Reference] | 1.056 (0.882-1.264) | 0.825 (0.687-0.991) | 1.016 (0.850-1.213) | 0.027      | 0.003        |
| Female                                       | 1.00 [Reference] | 1.227 (1.007-1.494) | 1.385 (1.135-1.690) | 1.602 (1.310-1.959) | $<0.001$   |              |

Model was adjusted as age, sex, education level, race, poverty, smoker, alcohol user, energy intake levels, sedentary time, BMI, total cholesterol, high-density lipoprotein cholesterol, eGFR, urinary creatinine, urinary albumin, diuretics, anti-gout medications, beta-blockers, diabetes, and hypertension when they were not the strata variables. *p-t*, *p* for trend; *p-int*, *p* for interaction.

**Table S3.** Subgroup analysis based on different age ( $\leq 50$  years;  $n=7534$ , and  $>50$  years;  $n=7337$ ) and gender (male;  $n=7328$ , and female;  $n=7543$ ) for the associations of the quartiles of blood metal levels with gout by logistic regression.

|                                              | Quartile 1       | Quartile 2          | Quartile 3          | Quartile 4          | <i>p-t</i> | <i>p-int</i> |
|----------------------------------------------|------------------|---------------------|---------------------|---------------------|------------|--------------|
|                                              | $\beta$          | $\beta$ (95%CI)     | $\beta$ (95%CI)     | $\beta$ (95%CI)     |            |              |
| <b>Mercury, <math>\mu\text{g/L}</math></b>   |                  |                     |                     |                     |            |              |
| $\leq 50$ years                              | 1.00 [Reference] | 0.886 (0.507-1.549) | 1.250 (0.725-2.154) | 1.509 (0.880-2.588) | 0.250      | 0.534        |
| $>50$ years                                  | 1.00 [Reference] | 1.113 (0.865-1.433) | 1.069 (0.824-1.386) | 1.337 (1.035-1.727) | 0.124      |              |
| Male                                         | 1.00 [Reference] | 1.097 (0.822-1.465) | 1.130 (0.841-1.517) | 1.508 (1.138-1.999) | 0.019      | 0.171        |
| Female                                       | 1.00 [Reference] | 1.084 (0.742-1.584) | 1.132 (0.767-1.671) | 1.150 (0.758-1.742) | 0.909      |              |
| <b>Manganese, <math>\mu\text{g/L}</math></b> |                  |                     |                     |                     |            |              |
| $\leq 50$ years                              | 1.00 [Reference] | 1.551 (0.881-2.731) | 1.584 (0.901-2.784) | 1.390 (0.757-2.553) | 0.385      | 0.212        |
| $>50$ years                                  | 1.00 [Reference] | 0.952 (0.757-1.198) | 0.907 (0.713-1.154) | 1.052 (0.815-1.357) | 0.713      |              |
| Male                                         | 1.00 [Reference] | 1.142 (0.883-1.475) | 1.172 (0.898-1.529) | 1.177 (0.879-1.575) | 0.589      | 0.108        |
| Female                                       | 1.00 [Reference] | 0.793 (0.543-1.160) | 0.718 (0.487-1.058) | 0.933 (0.630-1.383) | 0.3116     |              |
| <b>Lead, <math>\mu\text{g/dL}</math></b>     |                  |                     |                     |                     |            |              |
| $\leq 50$ years                              | 1.00 [Reference] | 1.135 (0.665-1.937) | 1.554 (0.888-2.722) | 1.999 (1.119-3.572) | 0.087      | 0.343        |
| $>50$ years                                  | 1.00 [Reference] | 1.107 (0.759-1.615) | 0.996 (0.688-1.443) | 1.792 (1.245-2.579) | $<0.001$   |              |
| Male                                         | 1.00 [Reference] | 1.361 (0.909-2.038) | 1.041 (0.691-1.570) | 1.935 (1.296-2.888) | $<0.001$   | 0.080        |
| Female                                       | 1.00 [Reference] | 0.894 (0.558-1.431) | 1.283 (0.816-2.018) | 1.930 (1.210-3.080) | 0.001      |              |
| <b>Cadmium, <math>\mu\text{g/L}</math></b>   |                  |                     |                     |                     |            |              |
| $\leq 50$ years                              | 1.00 [Reference] | 1.936 (1.174-3.193) | 1.116 (0.564-2.206) | 1.875 (0.945-3.720) | 0.030      | 0.075        |
| $>50$ years                                  | 1.00 [Reference] | 1.080 (0.827-1.412) | 1.117 (0.856-1.458) | 1.027 (0.752-1.403) | 0.828      |              |
| Male                                         | 1.00 [Reference] | 1.485 (1.127-1.957) | 1.232 (0.913-1.663) | 1.268 (0.895-1.796) | 0.046      | 0.054        |
| Female                                       | 1.00 [Reference] | 0.693 (0.435-1.102) | 0.850 (0.549-1.317) | 0.785 (0.475-1.296) | 0.460      |              |
| <b>Selenium, <math>\mu\text{g/L}</math></b>  |                  |                     |                     |                     |            |              |
| $\leq 50$ years                              | 1.00 [Reference] | 0.500 (0.268-0.936) | 1.029 (0.613-1.726) | 0.870 (0.513-1.476) | 0.095      | 0.062        |
| $>50$ years                                  | 1.00 [Reference] | 0.826 (0.653-1.046) | 0.753 (0.590-0.962) | 0.802 (0.629-1.022) | 0.108      |              |
| Male                                         | 1.00 [Reference] | 0.838 (0.635-1.105) | 0.907 (0.692-1.188) | 0.832 (0.633-1.093) | 0.517      | 0.327        |
| Female                                       | 1.00 [Reference] | 0.729 (0.504-1.054) | 0.681 (0.461-1.007) | 0.904 (0.623-1.314) | 0.164      |              |

Model was adjusted as age, sex, education level, race, poverty, smoker, alcohol user, energy intake levels, sedentary time, BMI, total cholesterol, high-density lipoprotein cholesterol, eGFR, urinary creatinine, urinary albumin, diuretics, beta-blockers, diabetes, and hypertension when they were not the strata variables. *p-t*, *p* for trend; *p-int*, *p* for interaction.
